# Supplementary material for: Early Monitoring Antiangiogenesis Treatment Response of Sunitinib in U87MG Tumor Xenograft by18F-FLT MicroPET/CT Imaging
Source: Hindawi journal article supplement (doi:10.1155/2014/218578), 2014-01-01
Supplement: f1 [file 218578.f1.pdf]

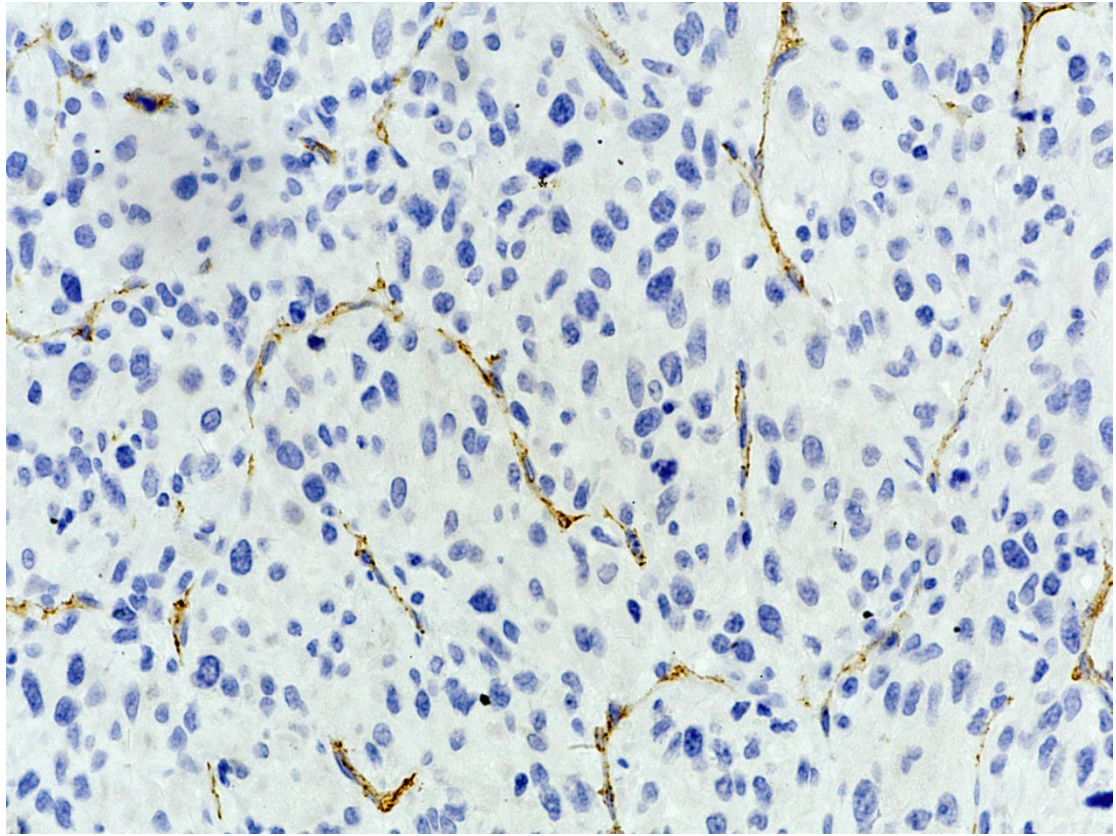

**Sunitinib-Day0**

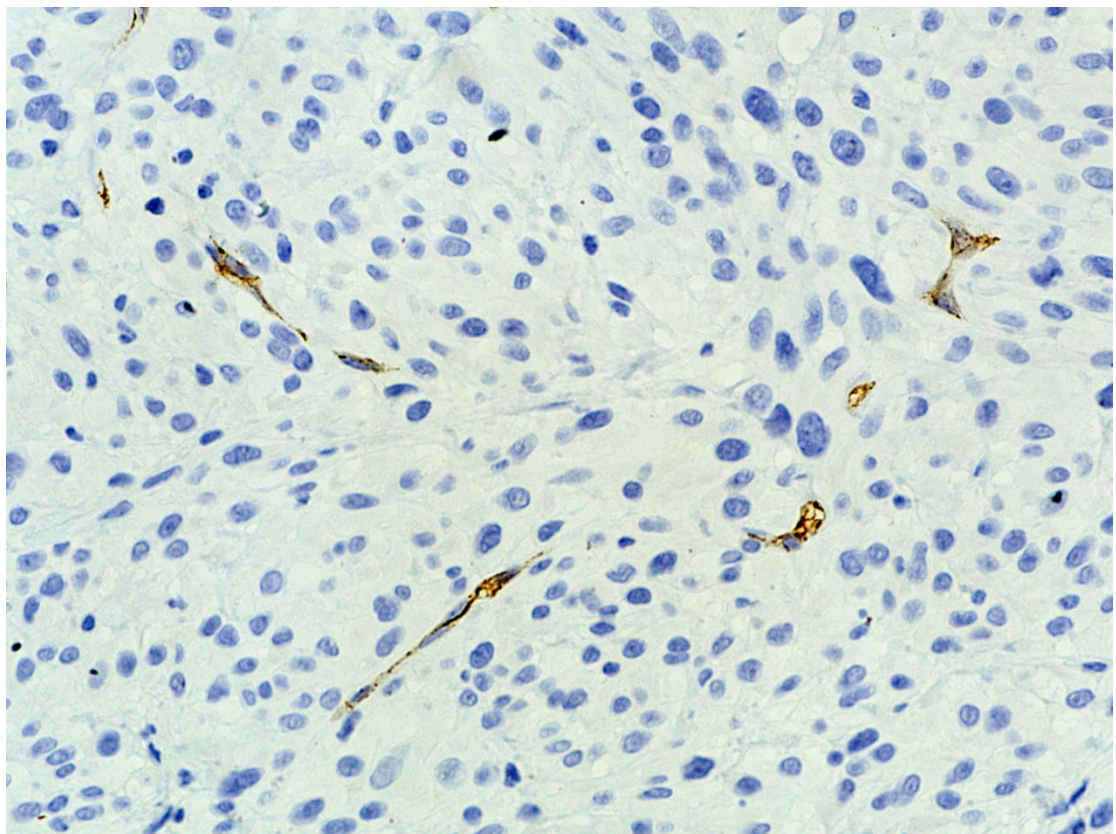

## **Sunitinib-Day3**
